# Supplementary material for: Conformational twisting of a formate-bridged diiridium complex enables catalytic formic acid dehydrogenation
Source: Royal Society of Chemistry journal article supplement (doi:10.1039/c8dt03268h), 2018-01-01
Supplement: c8dt03268h1.pdf [file c8dt03268h1.pdf]

## Supplementary Information

### **Conformational Twisting of a Formate-Bridged Diiridium Complex Enables Catalytic Formic Acid Dehydrogenation**

Paul J. Lauridsen, Zhiyao Lu, Jeff J. A. Celaje,  
Elyse A. Kedzie, Travis J. Williams\*

Donald P. and Katherine B. Loker Hydrocarbon Research Institute and  
Department of Chemistry, University of Southern California  
Los Angeles, California, 90089-1661  
travisw@usc.edu

#### **Table of Contents**

**I. Synthesis of Complexes 1b-d and 4a**

**II. <sup>1</sup>H NMR Spectra for Attempted Conversion to 5-type Dimers**

**III. Complete Kinetics Graph for Formic Acid Dehydrogenation**

## I. Synthesis of Complexes 1b-1d.

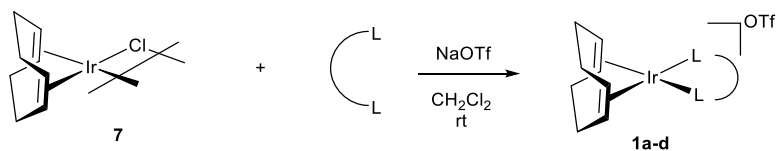

### Complex 1b

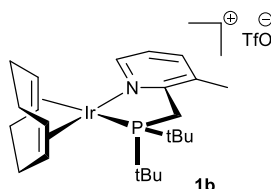

Complex **1b** was synthesized using the procedure for the synthesis of complex **1a** (See main text experimental section). 2-(di-*tert*-Butylphosphino)-6-methylpyridine (31.0 mg, 0.12 mmol), chloro(1,5-cyclooctadiene)iridium(I) dimer (41.4 mg, 0.062 mmol), and sodium trifluoromethanesulfonate (39.0 mg, 0.22 mmol) were used. Pure product was isolated as an orange solid (74.0 mg, 85% yield).

**<sup>1</sup>H NMR** (500 MHz, Methylene Chloride-*d*<sub>2</sub>)  $\delta$  8.08 (d,  $J$  = 5.9 Hz, 1H), 7.85 (d,  $J$  = 7.7 Hz, 1H), 7.36 (t,  $J$  = 6.8 Hz, 1H), 4.48 (d,  $J$  = 3.9 Hz, 4H) 3.46 (d,  $J$  = 8.9 Hz, 2H), 2.59 (s, 3H), 2.32 (d,  $J$  = 9.9 Hz, 4H), 1.31 (d,  $J$  = 13.6 Hz, 18H)

**<sup>13</sup>C NMR** (126 MHz, Methylene Chloride- *d*<sub>2</sub>)  $\delta$  164.83, 146.75, 141.56, 134.09, 134.02, 124.25, 37.29, 37.15, 32.02, 31.83, 29.79, 29.76, 22.04

**<sup>31</sup>P NMR** (202 MHz, Methylene Chloride-*d*<sub>2</sub>)  $\delta$  54.11

**HRMS** (ESI/APCI):  $m/z$  = 552.2341 g/mol, calc'd for C<sub>23</sub>H<sub>38</sub>IrNP<sup>+</sup> [M]<sup>+</sup>: 552.2366 g/mol.

**FT-IR** (thin film/cm<sup>-1</sup>)  $\nu$  = 2947, 2923, 2876, 2834, 2427, 2297, 1733, 1594, 1559, 1540, 1466, 1430, 1391, 1371, 1333, 1269, 1222, 1149, 1113, 1088, 1031, 966, 937, 893, 879, 825, 808

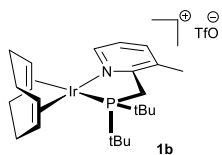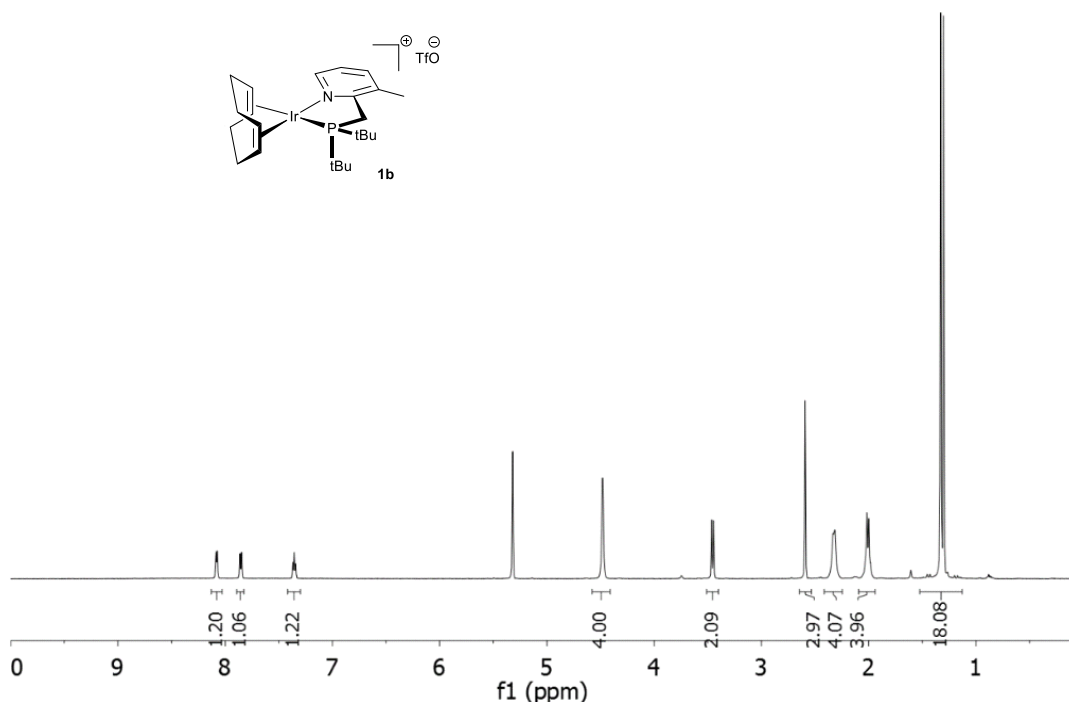

<sup>1</sup>H NMR Spectrum of Complex **1b** at 25 °C in CD<sub>2</sub>Cl<sub>2</sub>

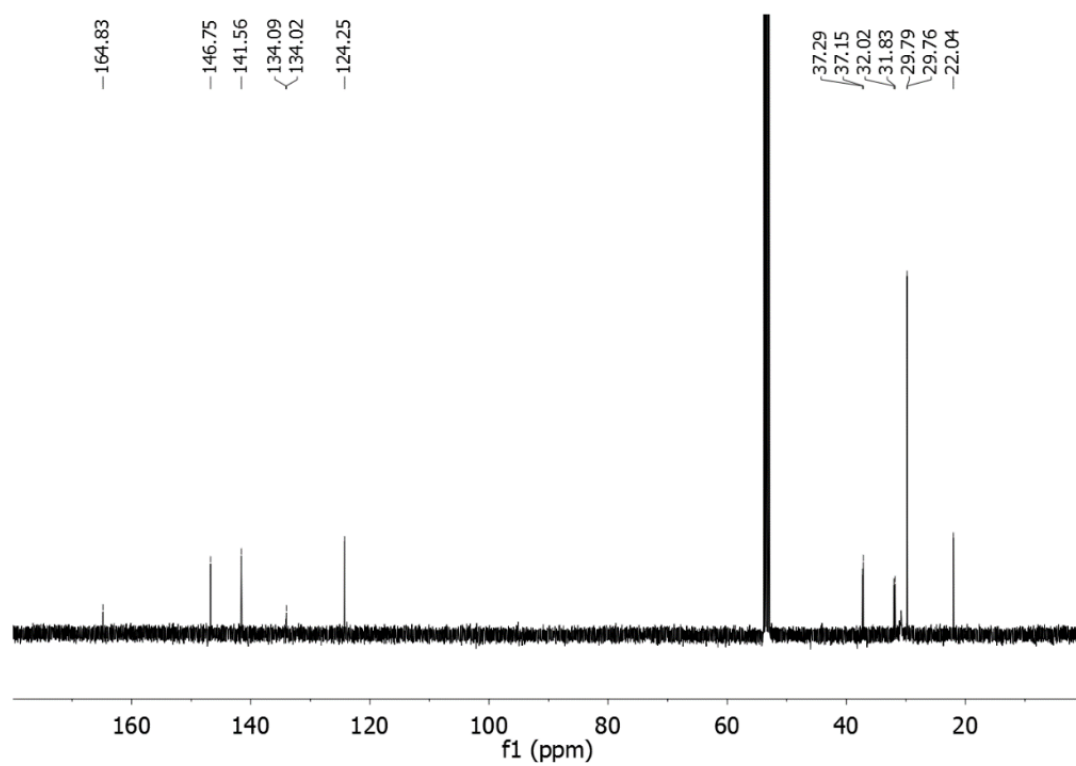

<sup>13</sup>C NMR Spectrum of Complex **1b** at 25 °C in CD<sub>2</sub>Cl<sub>2</sub>

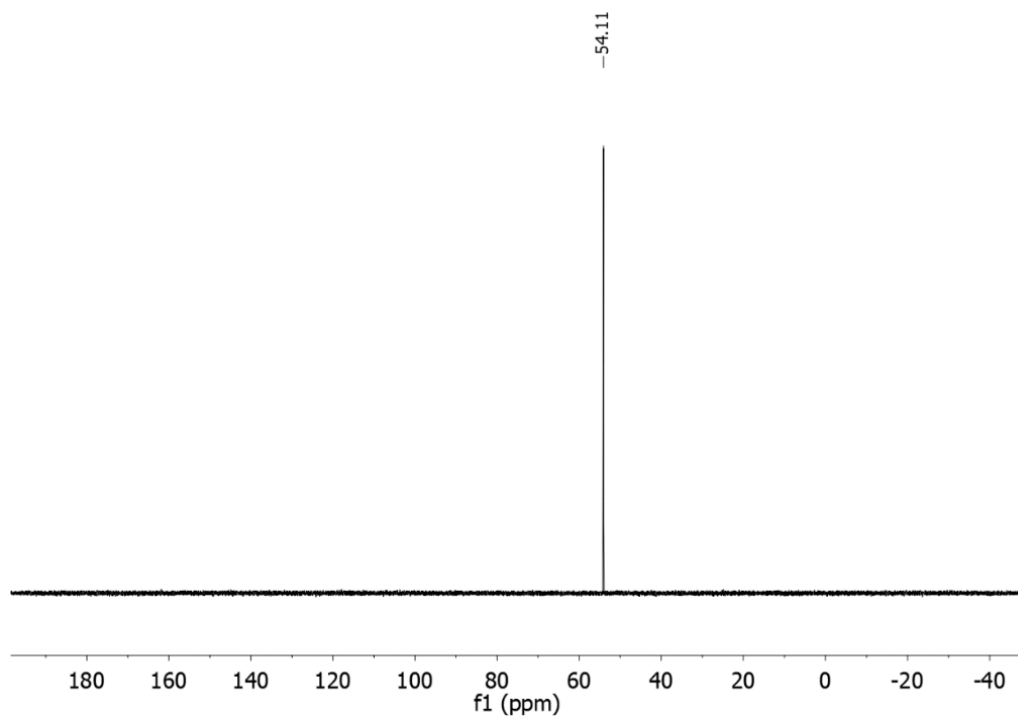

$^{31}\text{P}$  NMR Spectrum of Complex **1b** at 25 °C in  $\text{CD}_2\text{Cl}_2$

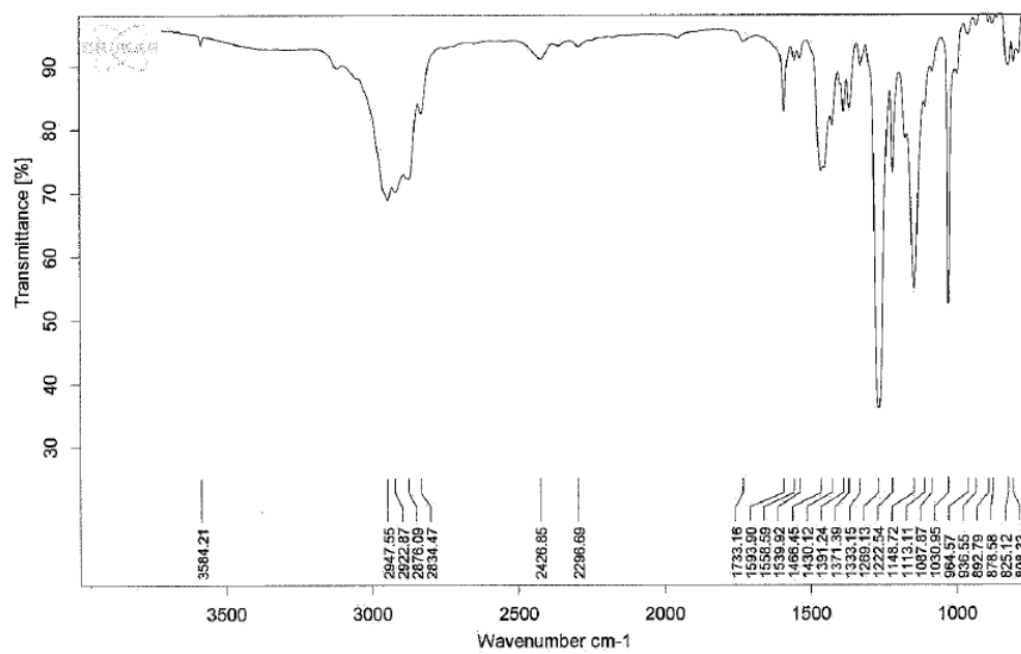

IR Spectrum of Complex **1b**.

## Complex 1c

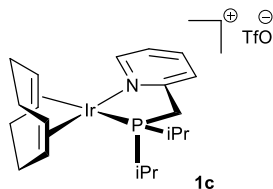

Complex **1c** was synthesized using the procedure used for the synthesis of complex **1a** (see main text experimental section). 2-((Diisopropylphosphino)methyl)pyridine (63.4 mg, 0.28 mmol), chloro(1,5-cyclooctadiene)iridium(I) dimer (95 mg, 0.14 mmol), and sodium trifluoromethanesulfonate (100 mg, 0.58 mmol) were used. Pure product was isolated as an orange solid (99 mg, 70 % yield).

**<sup>1</sup>H NMR** (600 MHz, Methylene Chloride-*d*<sub>2</sub>)  $\delta$  8.33 – 8.28 (m, 1H), 8.08 (tt, *J* = 7.7, 1.3 Hz, 1H), 7.99 (d, *J* = 8.0 Hz, 1H), 7.48 (ddd, *J* = 7.4, 5.9, 1.5 Hz, 1H), 5.00 (tt, *J* = 4.9, 2.1 Hz, 2H), 4.16 (dt, *J* = 5.7, 2.3 Hz, 2H), 3.58 (d, *J* = 10.1 Hz, 2H), 2.45 (dp, *J* = 8.8, 7.1 Hz, 2H), 2.41 – 2.31 (m, 2H), 2.31 – 2.19 (m, 4H), 2.05 – 1.94 (m, 2H), 1.26 (dd, *J* = 16.6, 7.1 Hz, 6H), 1.12 (dd, *J* = 15.2, 6.9 Hz, 6H).

**<sup>13</sup>C NMR** (151 MHz, Methylene Chloride-*d*<sub>2</sub>)  $\delta$  166.80, 149.79, 141.46, 125.10, 125.04, 124.44, 93.86, 93.79, 62.10, 33.47, 33.25, 33.06, 28.32, 24.51, 24.32, 18.53, 17.

**<sup>31</sup>P NMR** (202 MHz, Methylene Chloride-*d*<sub>2</sub>)  $\delta$  47.68

**MALDI:** *m/z* = 510.2 g/mol, calc'd. for C<sub>20</sub>H<sub>32</sub>IrNP<sup>+</sup> [M]<sup>+</sup>: 509.7 g/mol.

**FT-IR** (thin film/cm<sup>-1</sup>)  $\nu$  = 3126, 3066, 2964, 2925, 2884, 2838, 2430, 2367, 1999, 1720, 1609, 1564, 1542, 1471, 1450, 1390, 1373, 1334, 1270, 1224, 1152, 1109, 1083, 1083, 1069, 1032, 1002, 966, 934, 884, 823.

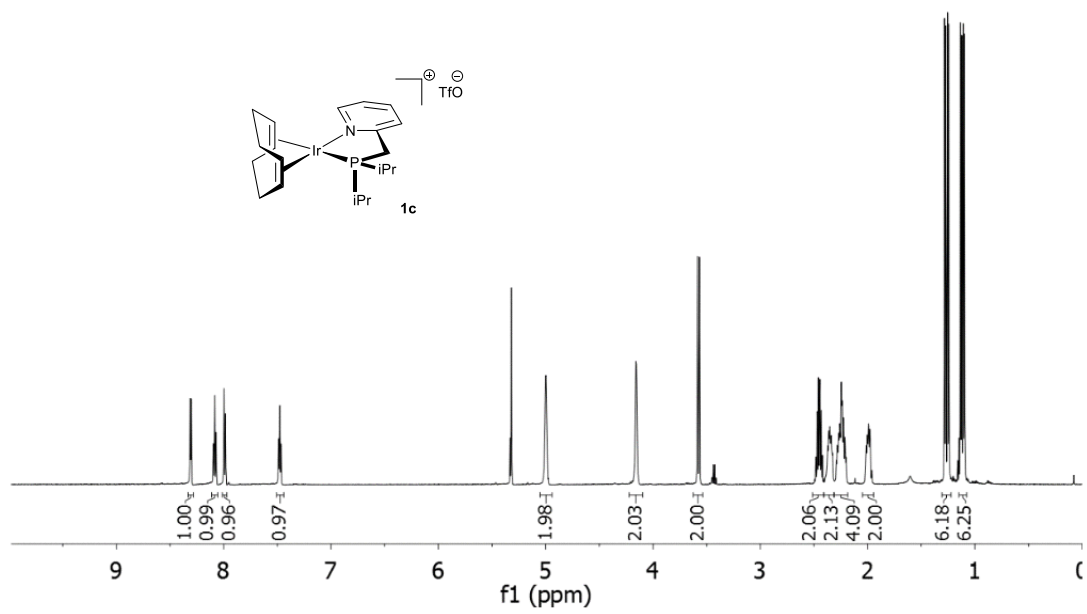

<sup>1</sup>H NMR Spectrum of Complex **1c** at 25 °C in CD<sub>2</sub>Cl<sub>2</sub>

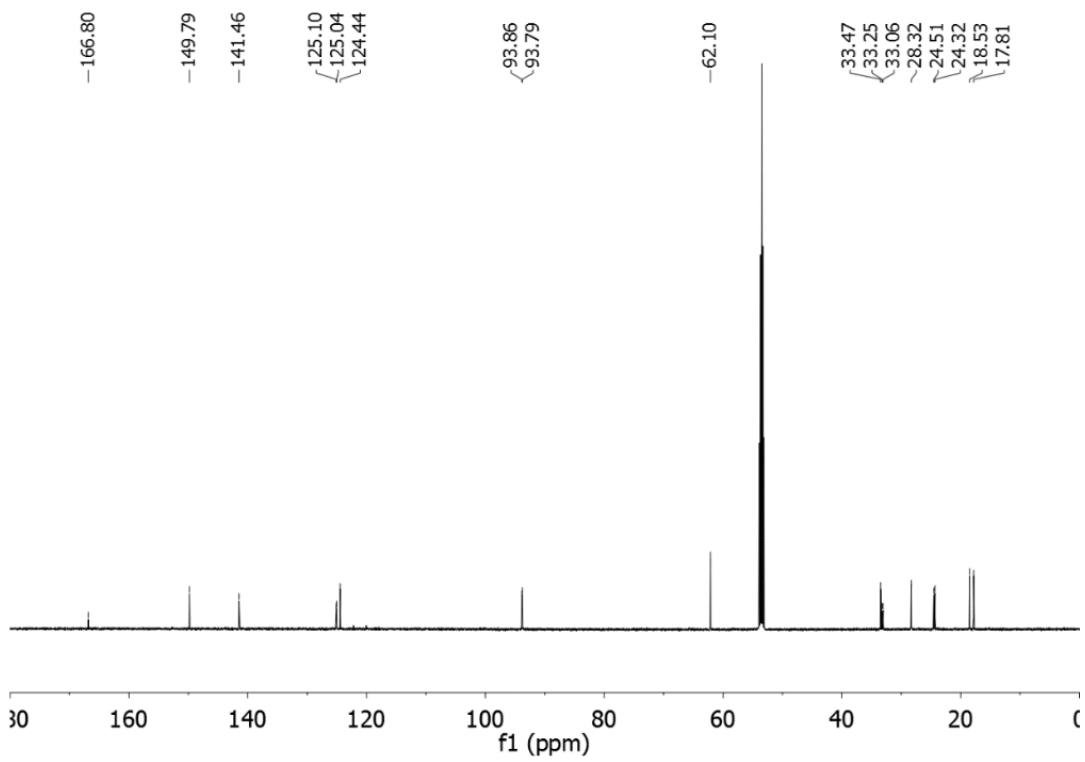

<sup>13</sup>C NMR Spectrum of Complex **1c** at 25 °C in CD<sub>2</sub>Cl<sub>2</sub>

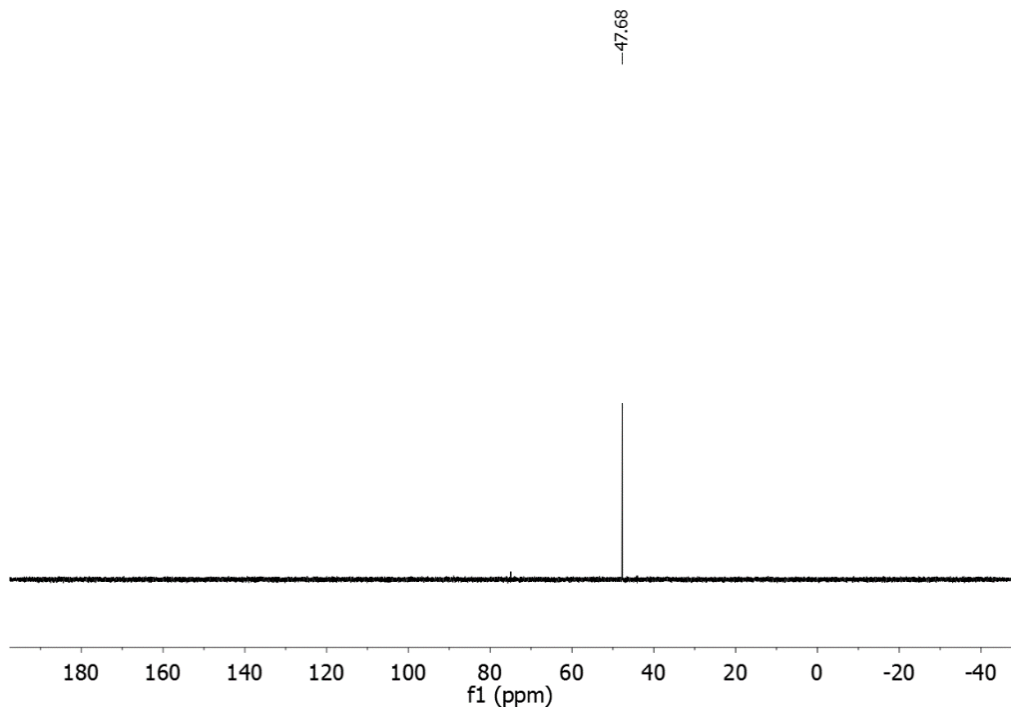

31P NMR Spectrum of Complex **1c** at 25 °C in CD<sub>2</sub>Cl<sub>2</sub>

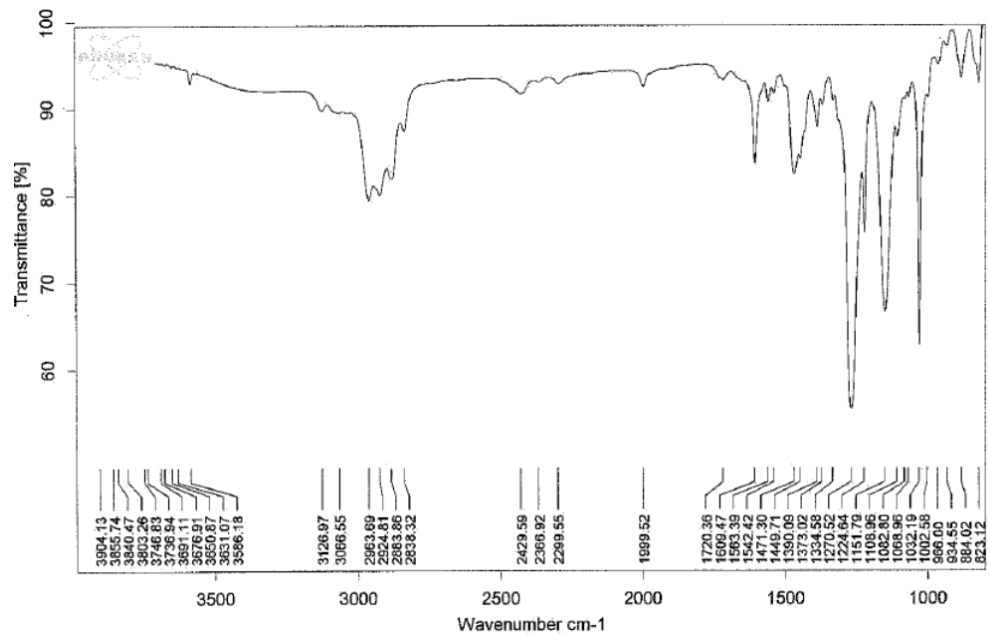

IR Spectrum of Complex **1c**

## Complex 1d

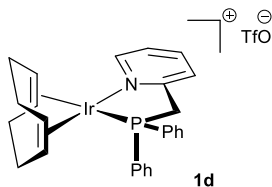

Complex **1d** was synthesized using the procedure used for the synthesis of complex **1a** (see main text experimental section). 2-((Diphenylphosphino)methyl)pyridine (80.5 mg, 0.29 mmol), chloro(1,5-cyclooctadiene)iridium(I) dimer (97.0 mg, 0.14 mmol), and sodium trifluoromethanesulfonate (39.0 mg, 0.22 mmol) were used. Pure product was isolated as an orange solid (140.0 mg, 67% yield).

**<sup>1</sup>H NMR** (600 MHz, Methylene Chloride-*d*<sub>2</sub>)  $\delta$  8.42 (dd,  $J = 5.9, 1.5$  Hz, 1H), 8.03 (tt,  $J = 7.8, 1.4$  Hz, 1H), 7.86 (d,  $J = 7.9$  Hz, 1H), 7.65 – 7.55 (m, 5H), 7.54 – 7.47 (m, 4H), 7.20 – 7.11 (m, 1H), 5.23 (d,  $J = 5.7$  Hz, 2H), 4.30 (d,  $J = 10.9$  Hz, 2H), 3.68 (d,  $J = 4.7$  Hz, 2H), 2.35 (d,  $J = 16.9$  Hz, 5H), 2.11 (t,  $J = 8.6$  Hz, 4H)

**<sup>13</sup>C NMR** (126 MHz, Methylene Chloride-*d*<sub>2</sub>)  $\delta$  163.65, 163.60, 150.44, 141.42, 138.02, 133.30, 133.21, 132.34, 132.32, 129.61, 129.53, 129.01, 128.20, 127.54, 127.11, 125.69, 125.60, 125.28, 124.94, 122.40, 119.84, 95.90, 95.80, 63.75, 41.42, 41.17, 32.91, 28.86, 21.20

**<sup>31</sup>P NMR** (202 MHz, Methylene Chloride-*d*<sub>2</sub>)  $\delta$  34.47

**HRMS** (ESI/APCI):  $m/z = 578.1605$  g/mol, calc'd. for C<sub>26</sub>H<sub>28</sub>IrNP<sup>+</sup> [M]<sup>+</sup>: 578.1583 g/mol.

**FT-IR** (thin film/cm<sup>-1</sup>)  $\nu = 3056, 2963, 2919, 2886, 2836, 1608, 1564, 1475, 1436, 1475, 1436, 1400, 1334, 1310, 1267, 1223, 1152, 1104, 1066, 1030, 999, 966, 895, 842, 817.$



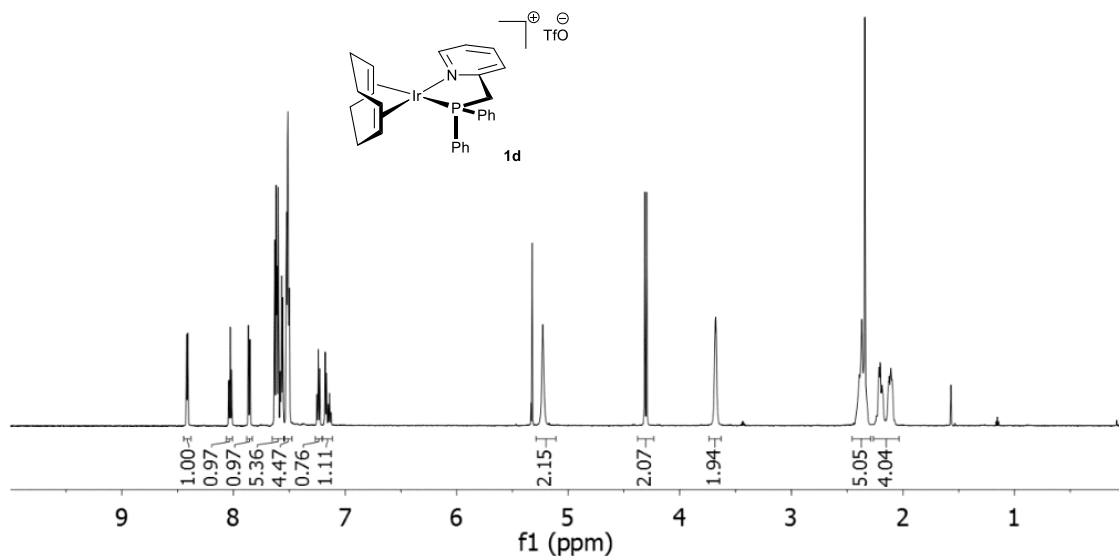

<sup>1</sup>H NMR Spectrum of Complex **1d** at 25 °C in CD<sub>2</sub>Cl<sub>2</sub>

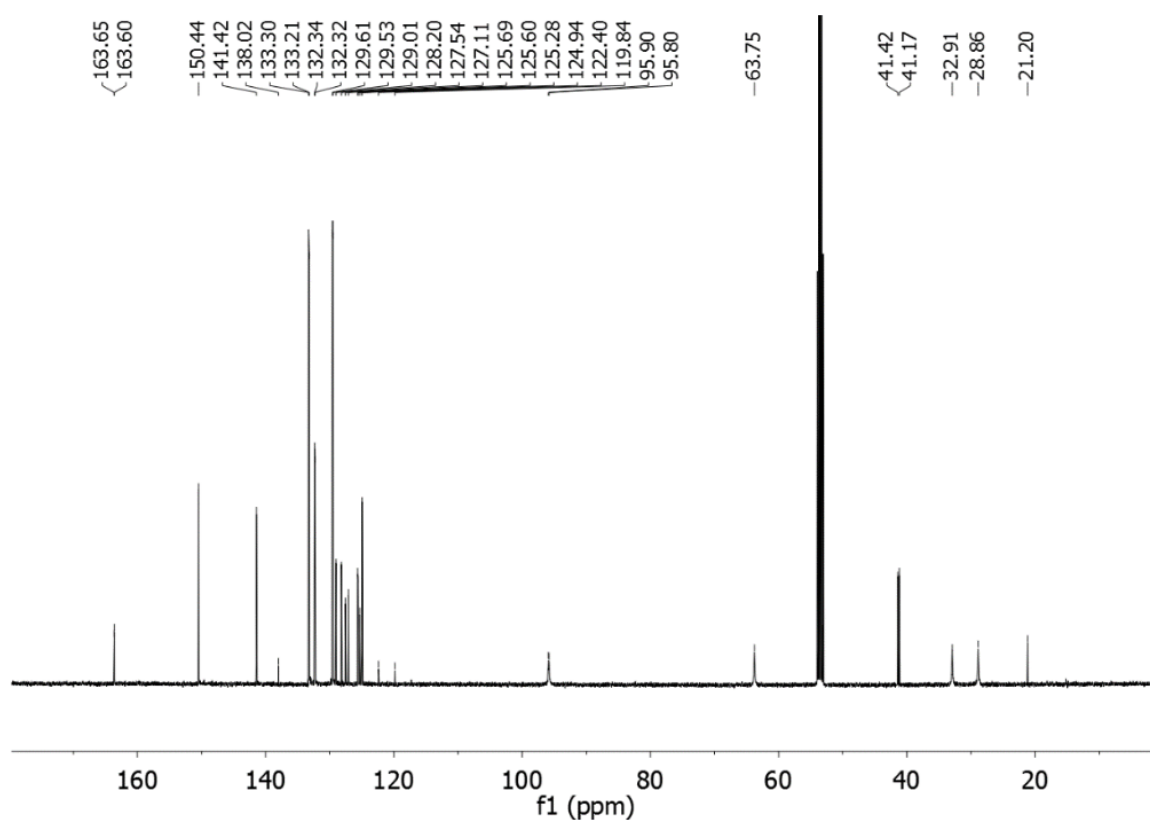

<sup>13</sup>C NMR Spectrum of Complex **1d** at 25 °C in CD<sub>2</sub>Cl<sub>2</sub>

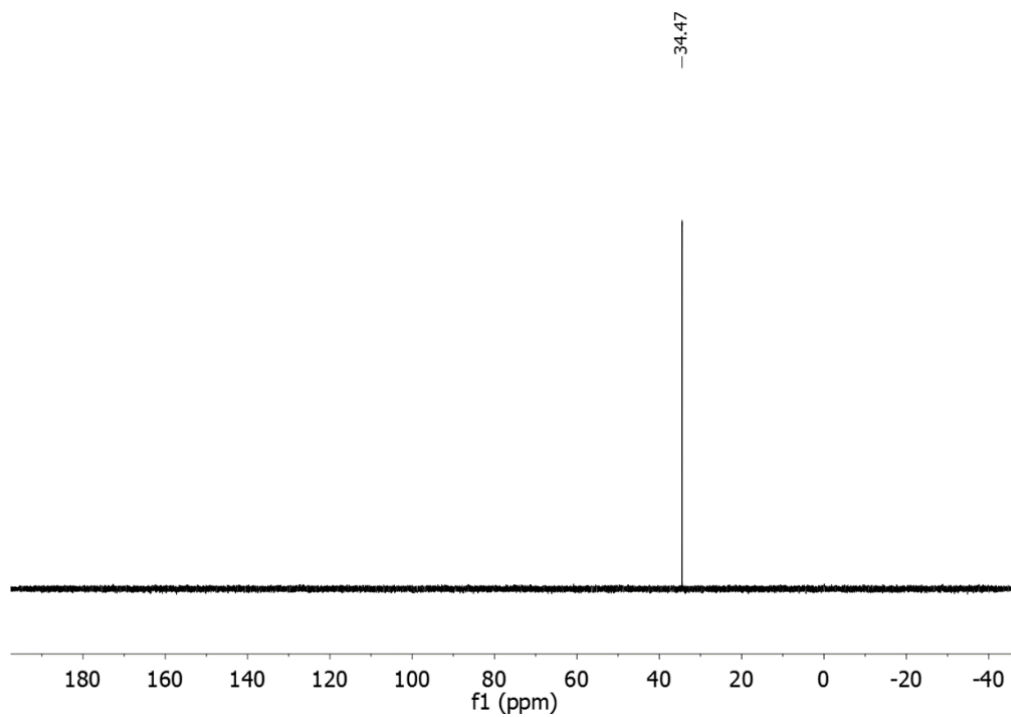

$^{31}\text{P}$  NMR Spectrum of Complex **1d** at 25 °C in  $\text{CD}_2\text{Cl}_2$

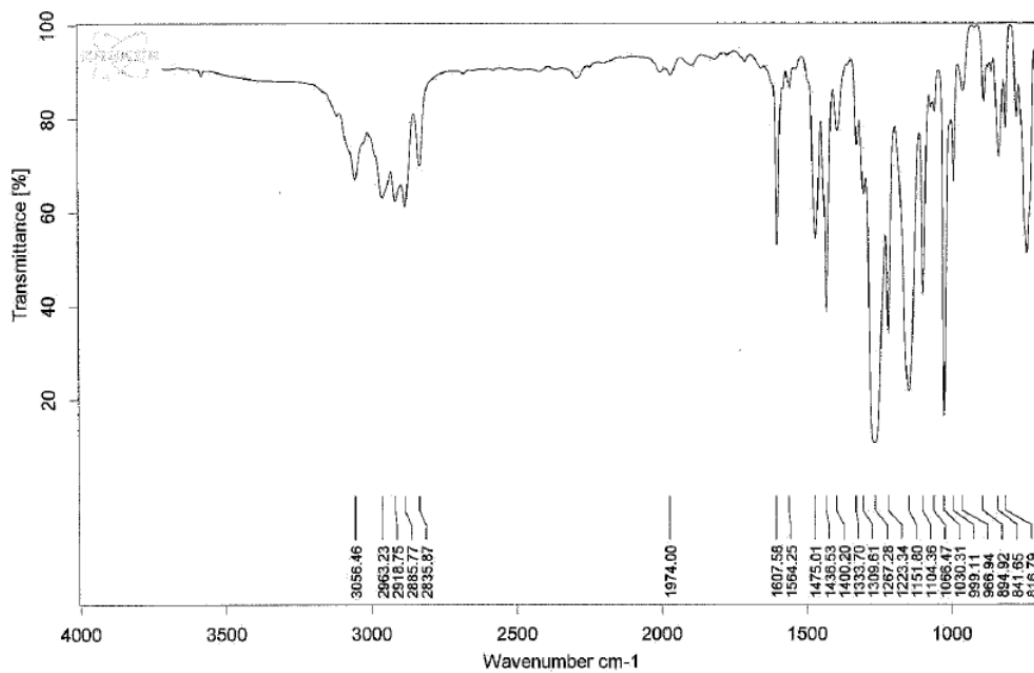

IR spectrum of complex **1d**

## Complex 4a (solv = MeCN)

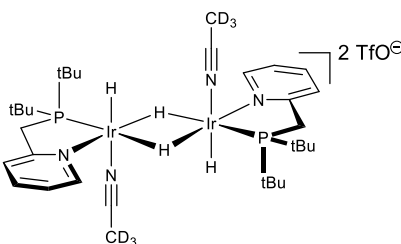

The synthesis of **4a** is described in the main text. We find that the best characterization data for this species can be obtained when the synthesis is run in acetonitrile solvent. These data follow. The crude NMR includes cyclooctene side product.

**<sup>1</sup>H NMR** (600 MHz, Methylene Chloride-*d*<sub>2</sub>)  $\delta$  8.92 – 8.80 (m, 1H), 7.95 – 7.87 (m, 1H), 7.63 (d,  $J = 7.9$  Hz, 1H), 7.36 (m, 1H), 3.70 (m, 1H), 3.44 (m, 1H), 1.27 – 1.10 (m, 18H), -20.97 (s, 1H), -22.66 (d,  $J = 21.5$  Hz, 1H).

**<sup>31</sup>P NMR** (202 MHz, Methylene Chloride-*d*<sub>2</sub>)  $\delta$  58.59 (t,  $J = 17.3$  Hz).

**HRMS** (ESI/APCI):  $m/z = 476.1886$  g/mol, calc'd. for C<sub>32</sub>H<sub>52</sub>D<sub>6</sub>Ir<sub>2</sub>N<sub>4</sub>P<sub>2</sub><sup>2+</sup> [M]<sup>2+</sup>: 476.1879 g/mol.

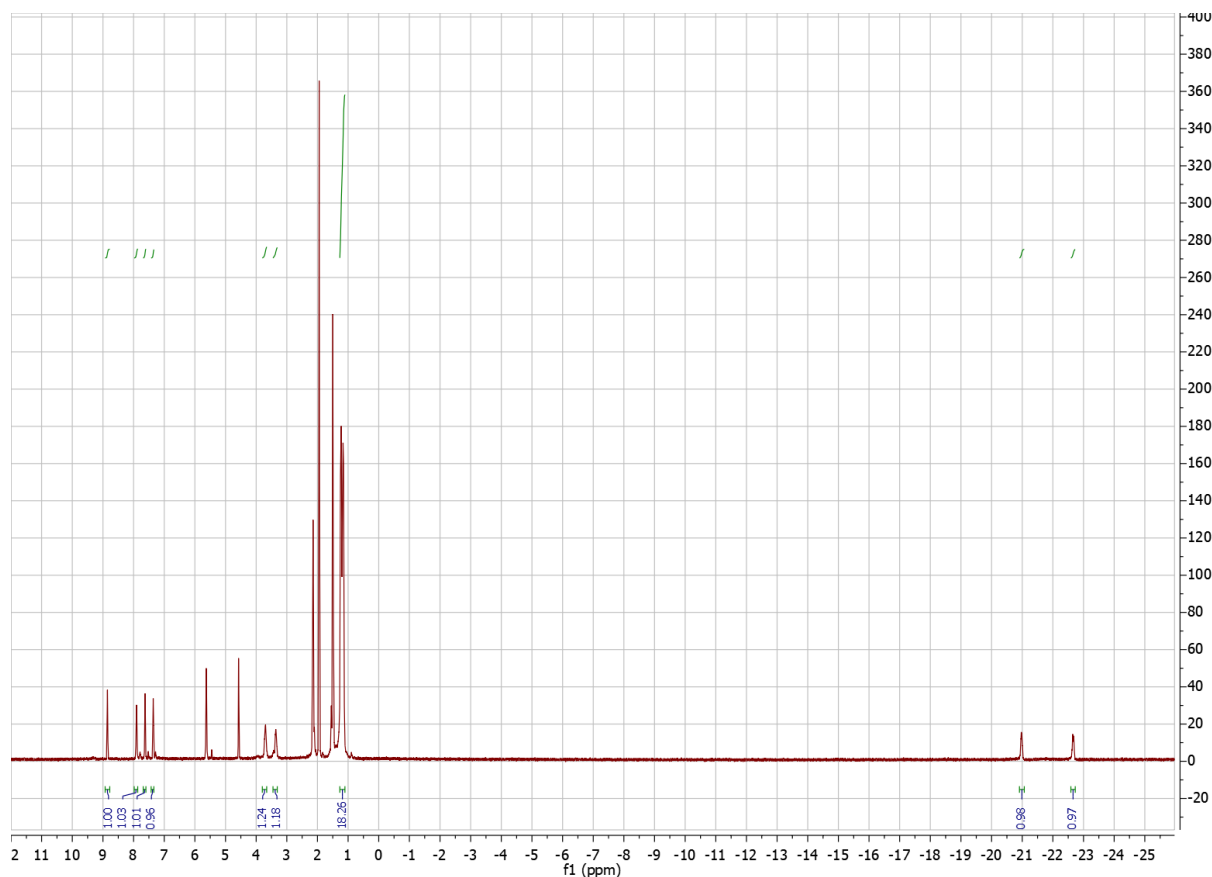

<sup>1</sup>H NMR Spectrum of Complex 4 at 25 °C in CD<sub>3</sub>CN

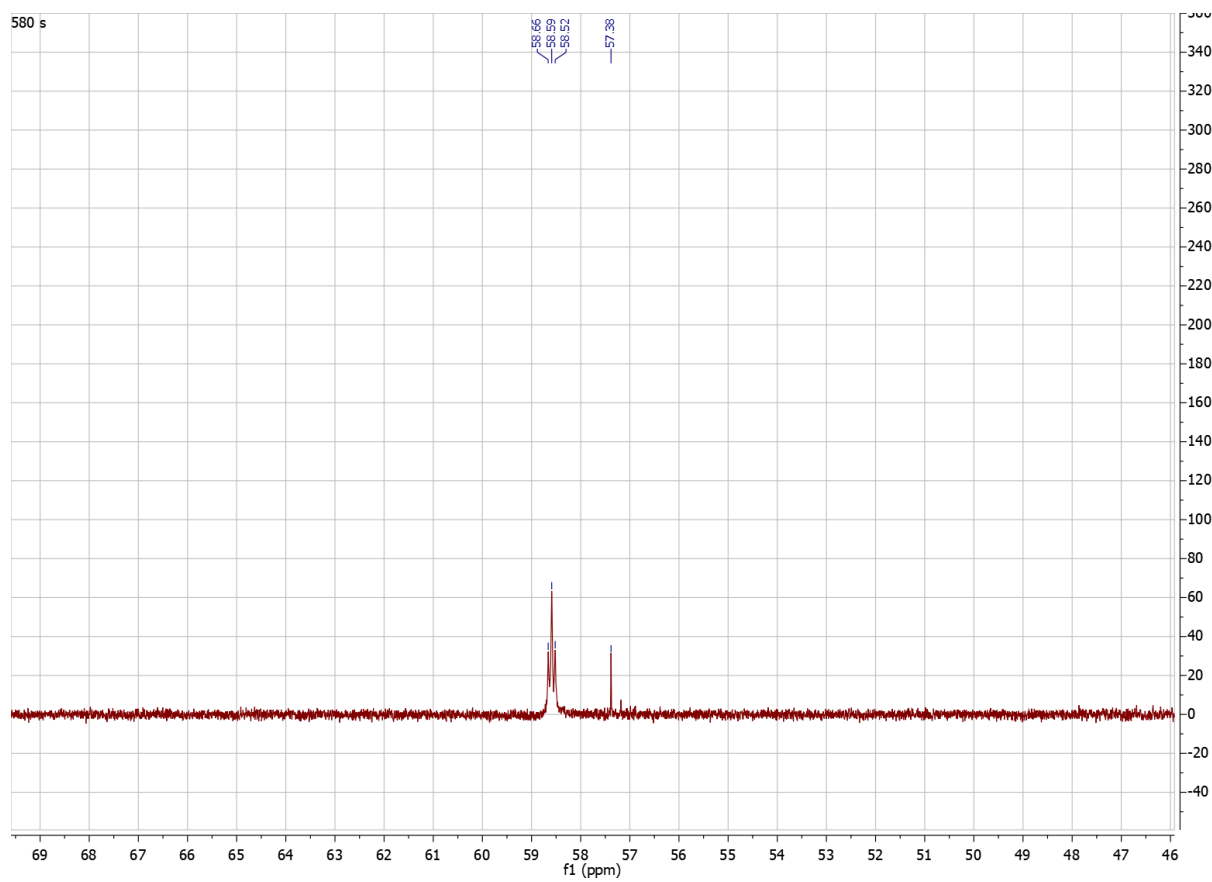

$^{31}\text{P}$  NMR Spectrum of Complex **4** at 25 °C in  $\text{CD}_3\text{CN}$

## 2-((Diphenylphosphino)methyl)pyridine Ligand

All reactions were kept strictly air-free using Schlenk and drybox techniques. The ligand was synthesized using a modified literature procedure as stated in the main text. A solution of 2-picoline (270  $\mu$ L, 2.69 mmol) in 18 mL THF was cooled to  $-78$   $^{\circ}$ C. *n*-BuLi (1.7 mL of a 1.56 M solution in hexanes, 2.69 mmol) was added dropwise over 15 minutes and the solution turns orange. The solution was allowed to warm to room temperature and stirred for 1 hour. A solution of diphenylchlorophosphine (0.5 mL, 2.56 mmol) in 20 mL THF was cooled to  $-94$   $^{\circ}$ C in an acetone/liquid nitrogen slush bath. The orange pyridine-2-ylmethanide solution was added slowly dropwise over 75 minutes while the slush bath was kept cold throughout. The resulting light yellow solution was allowed to warm slowly and stirred overnight. The solvent was evaporated in vacuo. The product was extracted with dichloromethane. The dichloromethane was evaporated in vacuo resulting in a mixture of yellow liquid and solid. The product was extracted with hexanes. After evaporation of the hexanes in vacuo, the product was obtained as white solid (260 mg, 35% yield).

$^1\text{H NMR}$  (600 MHz, Acetonitrile- $d_3$ )  $\delta$  8.39 (d,  $J = 2.6$  Hz, 1H), 7.53 (t,  $J = 7.6$  Hz, 1H), 7.50 – 7.41 (m, 4H), 7.34 (s, 6H), 7.09 (d,  $J = 7.8$  Hz, 2H), 3.66 (s, 2H).

$^{31}\text{P NMR}$  (202 MHz, Acetonitrile- $d_3$ )  $\delta$  -11.55

Further efforts to characterize this material were inhibited by its high air sensitivity. The white solid was typically taken on through the reactions that follow with no further purification.

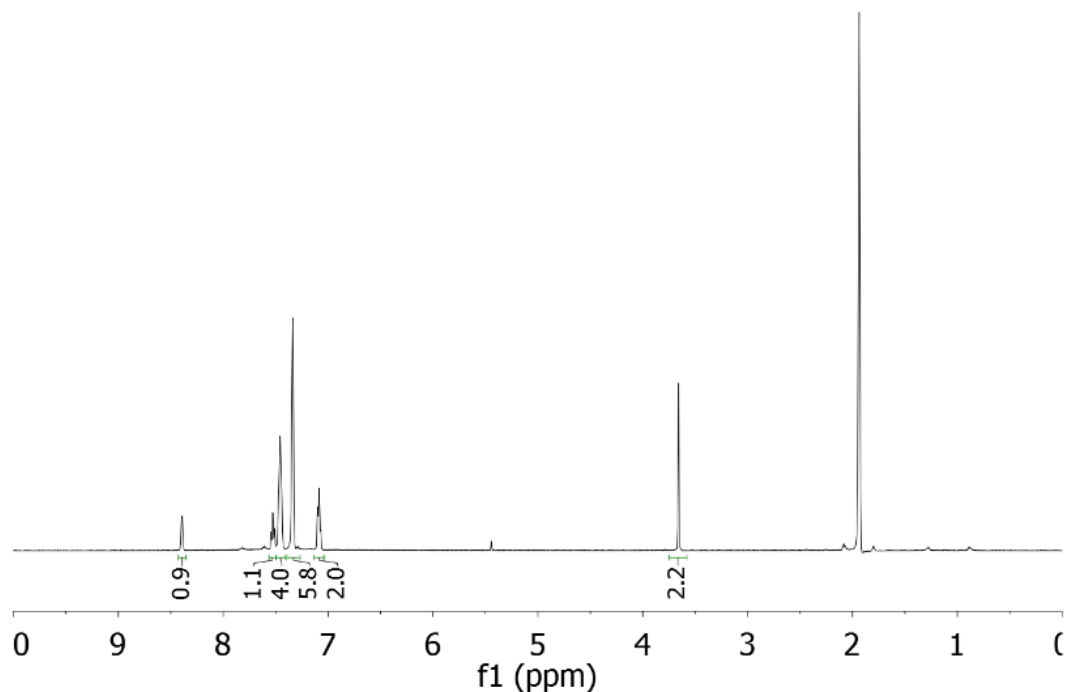

$^1\text{H NMR}$  spectrum of 2-((Diphenylphosphino)methyl)pyridine at 25  $^{\circ}$ C in  $\text{CD}_3\text{CN}$

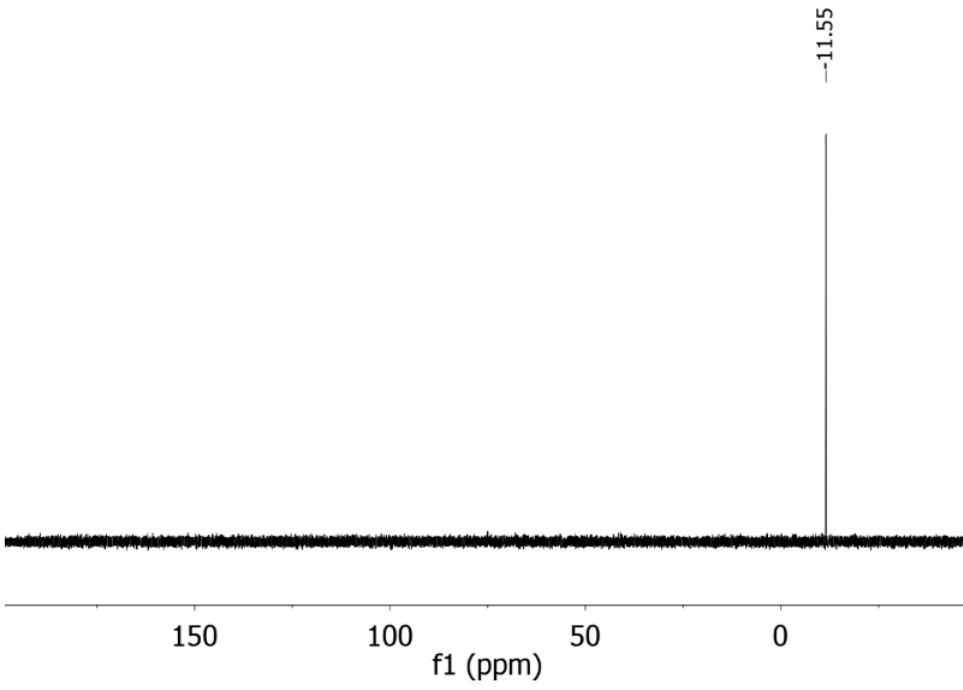

$^{31}\text{P}$  spectrum of 2-((Diphenylphosphino)methyl)pyridine at 25 °C in  $\text{CD}_3\text{CN}$

## II. 1d $^1\text{H}$ NMR Spectra for Attempted Conversion to 5-type Dimers

### Complex 1b

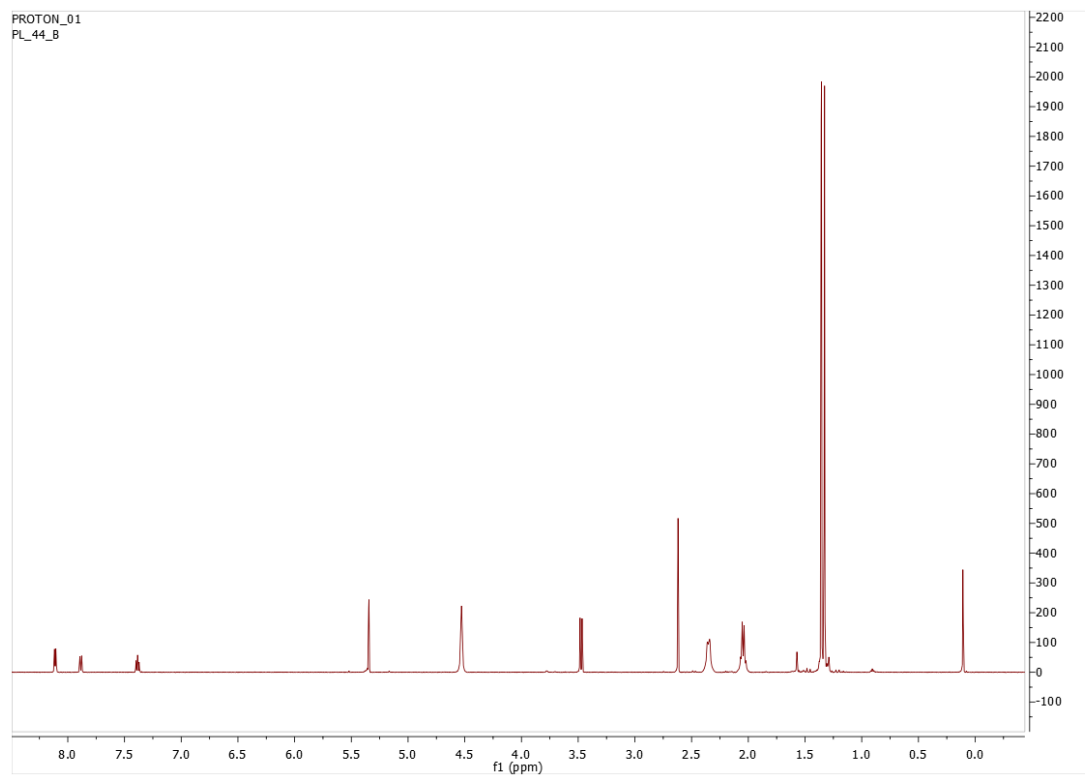

### $^1\text{H}$ NMR Spectrum of Complex 1b at 25 °C in $\text{CD}_2\text{Cl}_2$

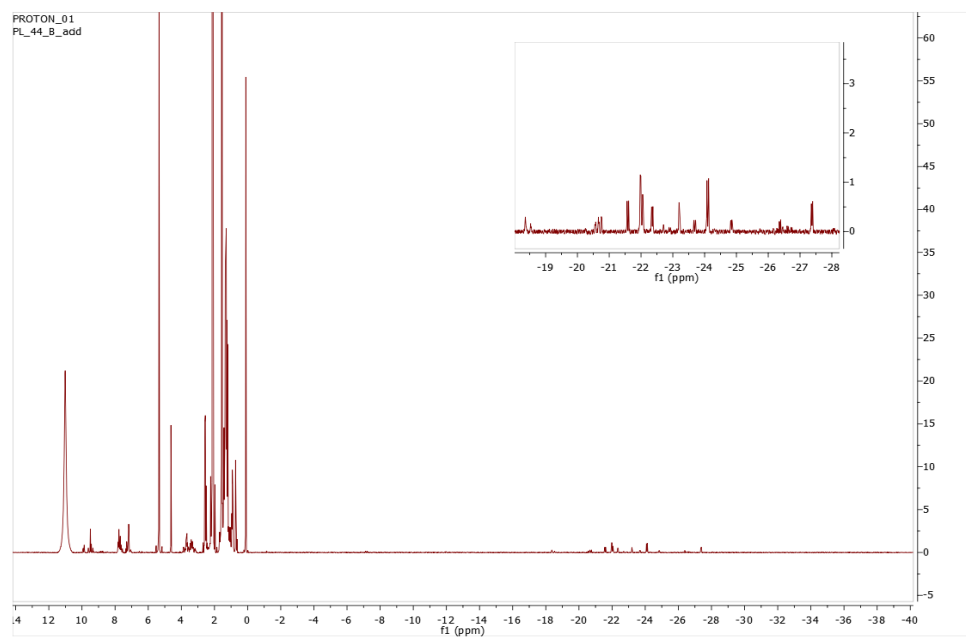

### $^1\text{H}$ NMR Spectrum of Complex 1b after addition of hydrogen and acetic acid at 25 °C in $\text{CD}_2\text{Cl}_2$

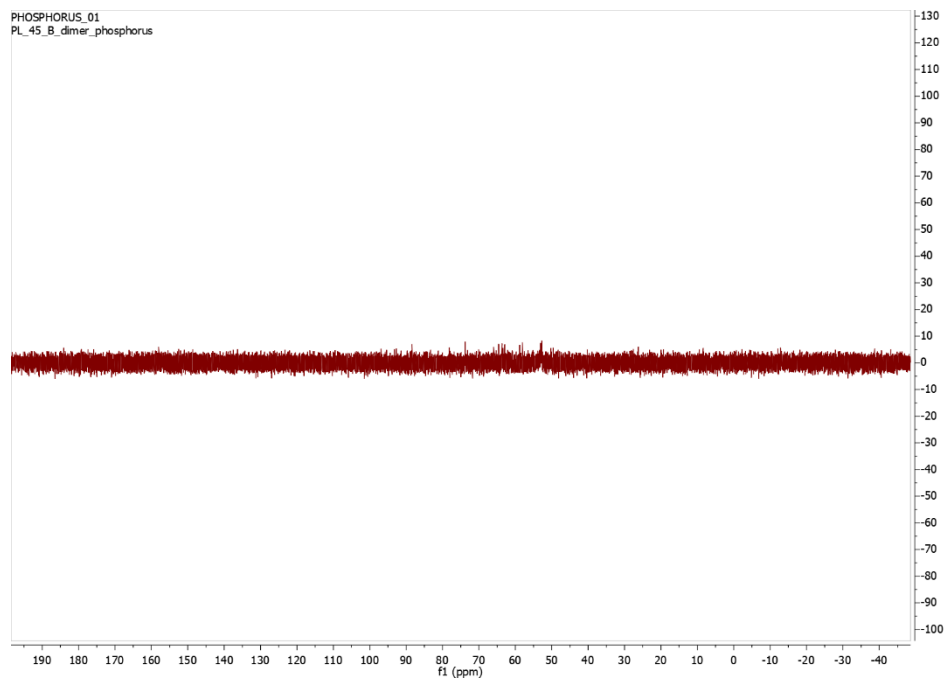

$^{31}\text{P}$  NMR Spectrum of Complex **1b** after addition of hydrogen and acetic acid at 25 °C in  $\text{CD}_2\text{Cl}_2$



## Complex 1c

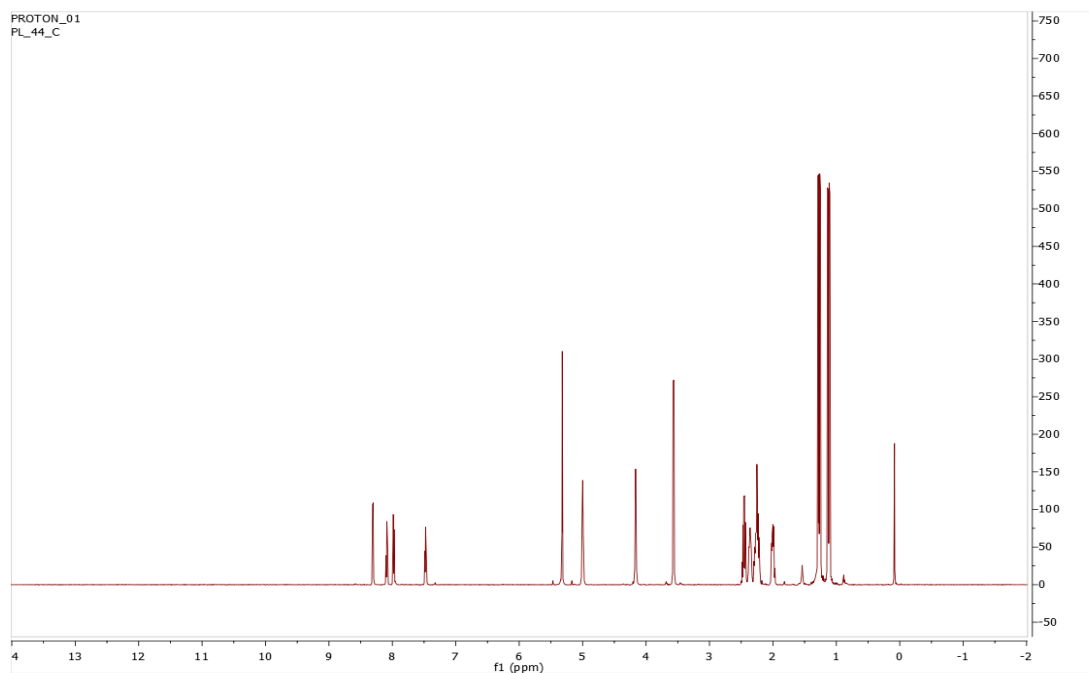

$^1\text{H}$  NMR Spectrum of Complex **1c** at 25 °C in  $\text{CD}_2\text{Cl}_2$

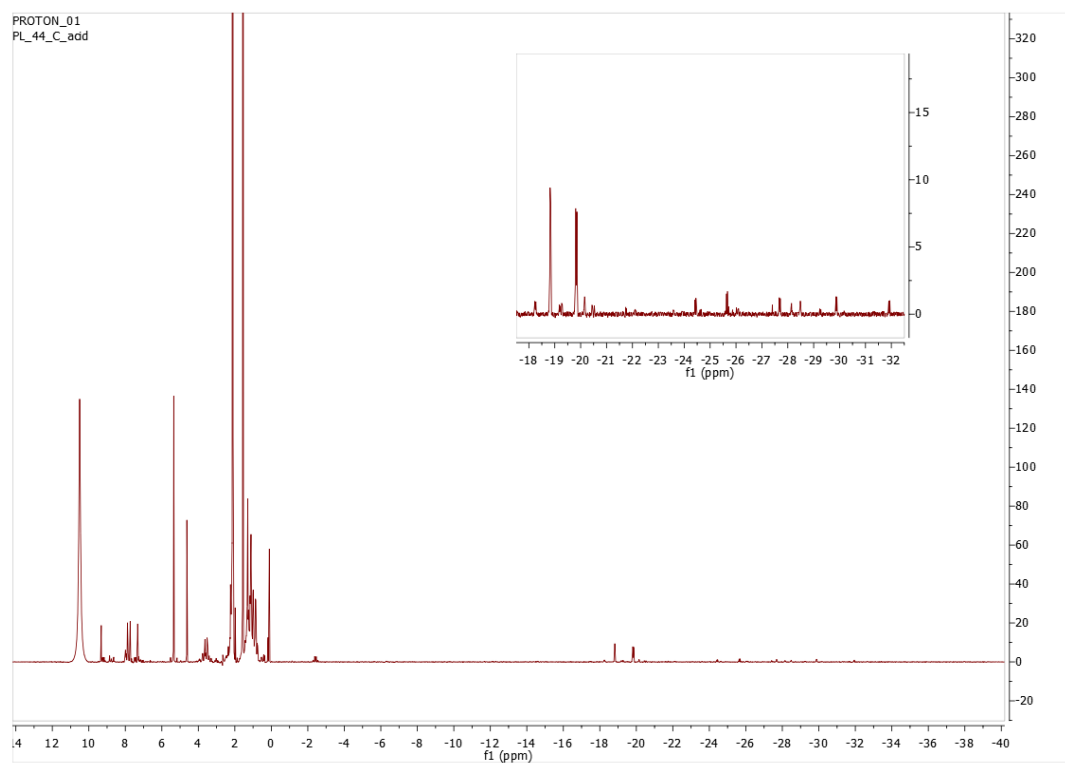

$^1\text{H}$  NMR Spectrum of Complex **1c** after addition of hydrogen and acetic acid at 25 °C in  $\text{CD}_2\text{Cl}_2$

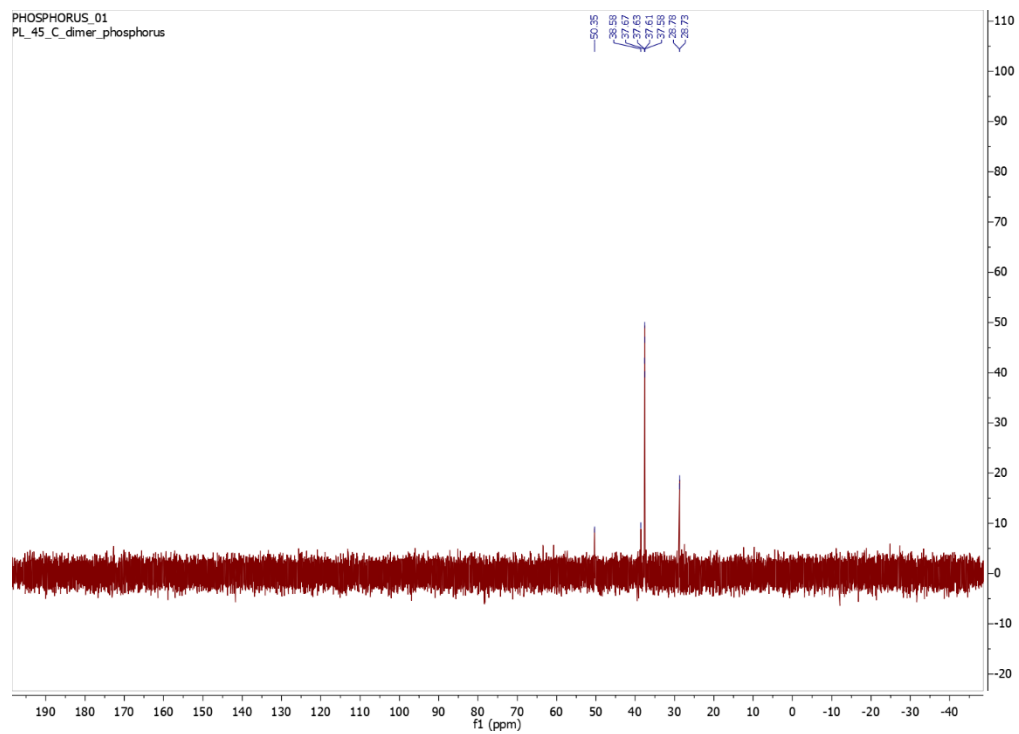

$^{31}\text{P}$  NMR Spectrum of Complex **1c** after addition of hydrogen and acetic acid at 25 °C in  $\text{CD}_2\text{Cl}_2$

# Complex 1d

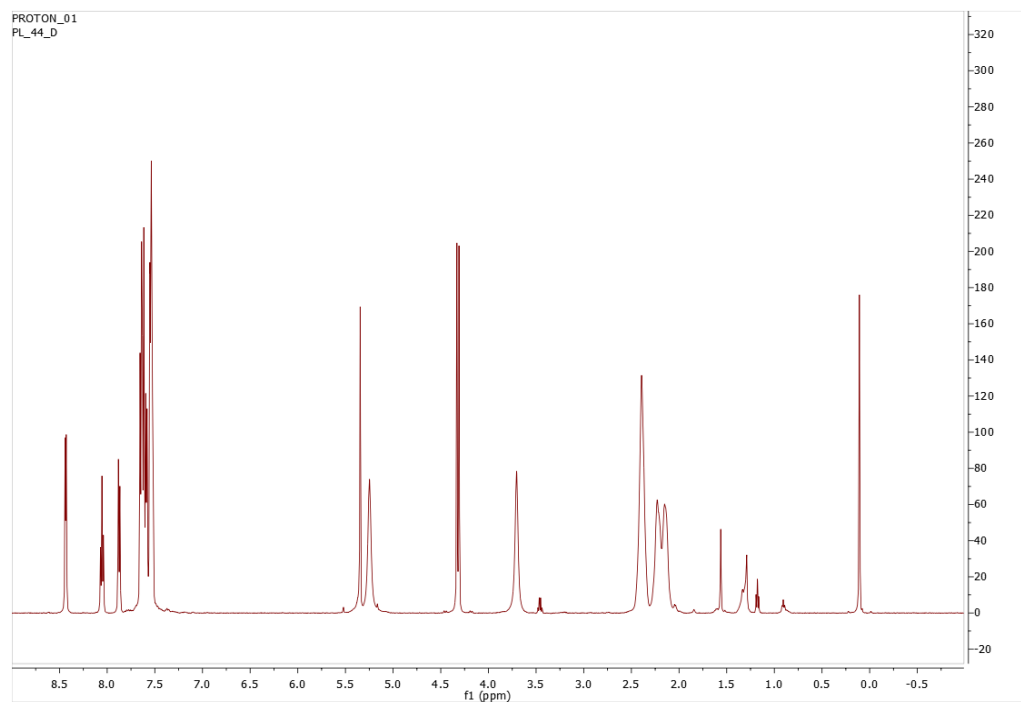

$^1\text{H}$  NMR Spectrum of Complex **1d** at 25 °C in  $\text{CD}_2\text{Cl}_2$

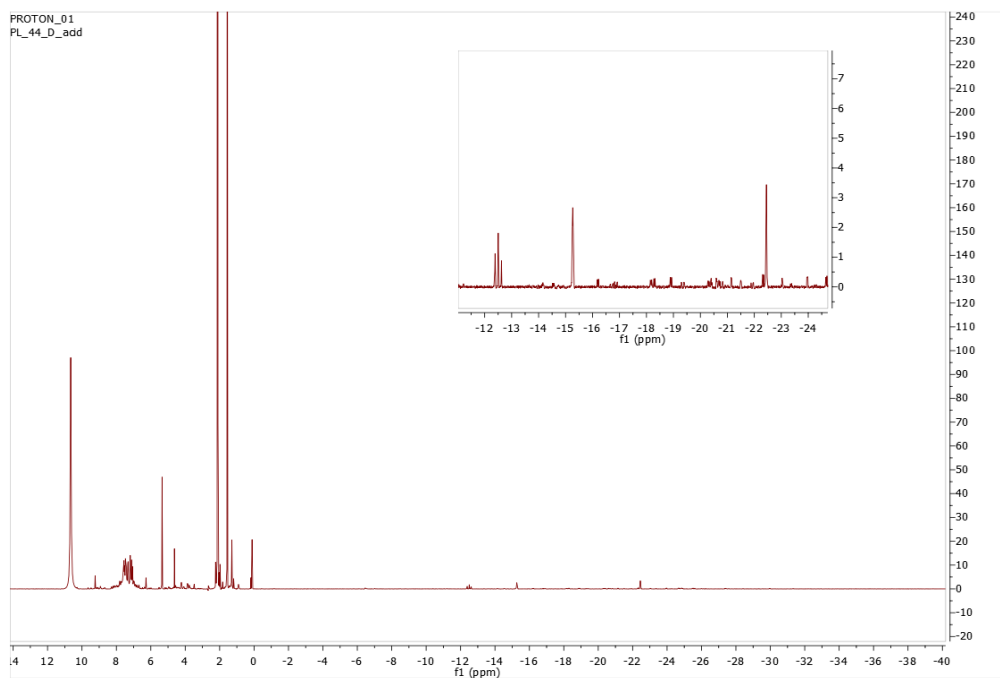

$^1\text{H}$  NMR Spectrum of Complex **1d** after addition of hydrogen and acetic acid at 25 °C in  $\text{CD}_2\text{Cl}_2$

## Complex 1e

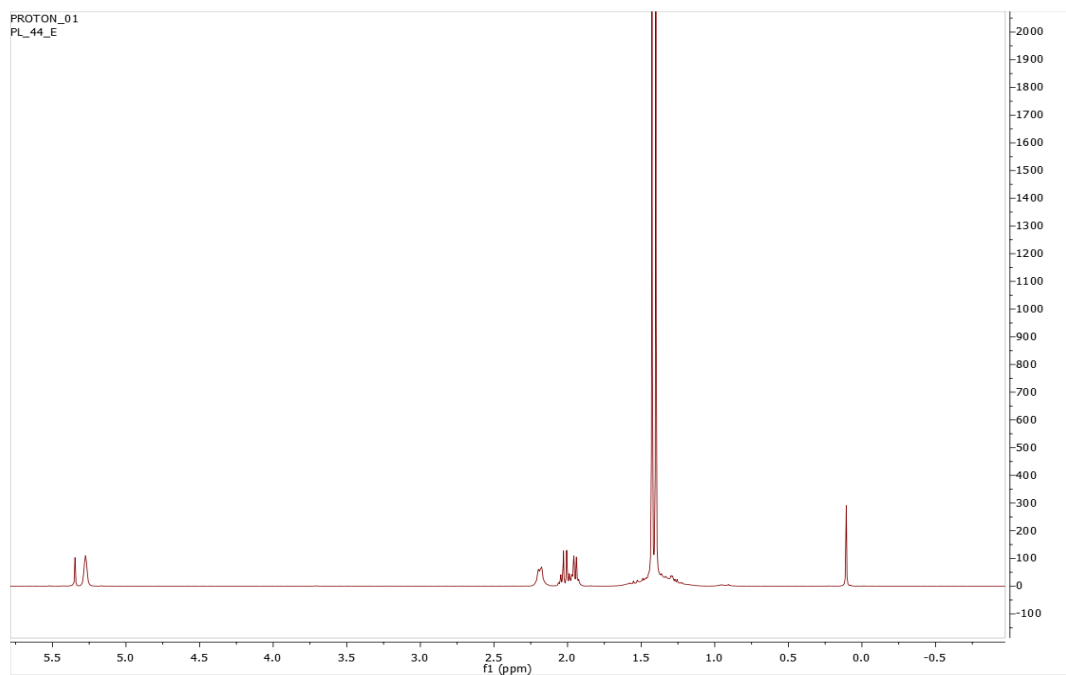

$^1\text{H}$  NMR Spectrum of Complex **1e** at 25 °C in  $\text{CD}_2\text{Cl}_2$

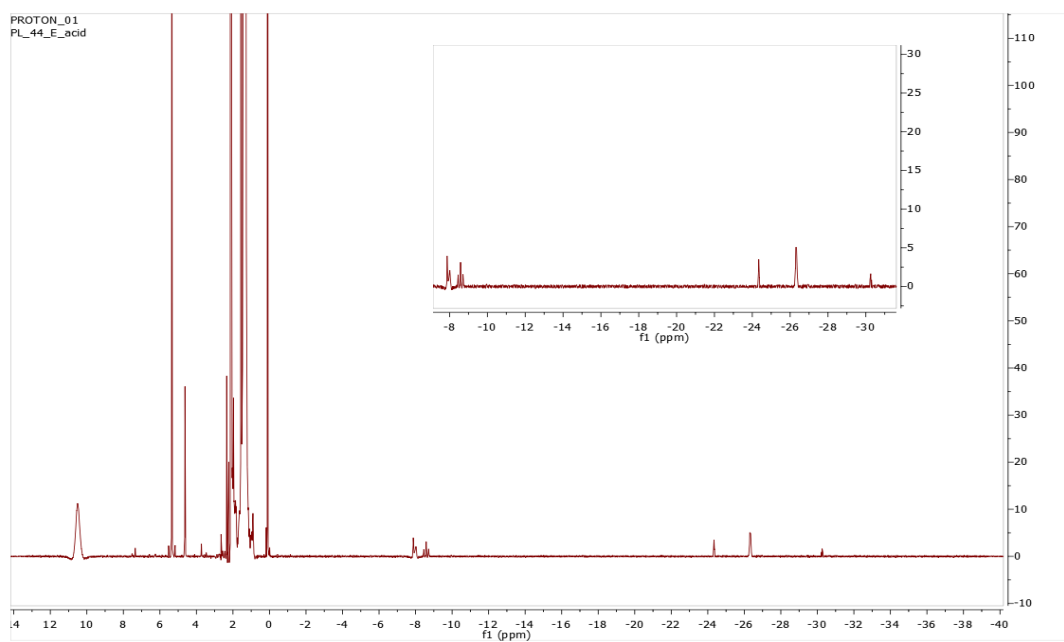

$^1\text{H}$  NMR Spectrum of Complex **1e** after addition of hydrogen and acetic acid at 25 °C in  $\text{CD}_2\text{Cl}_2$

## Complex 1g

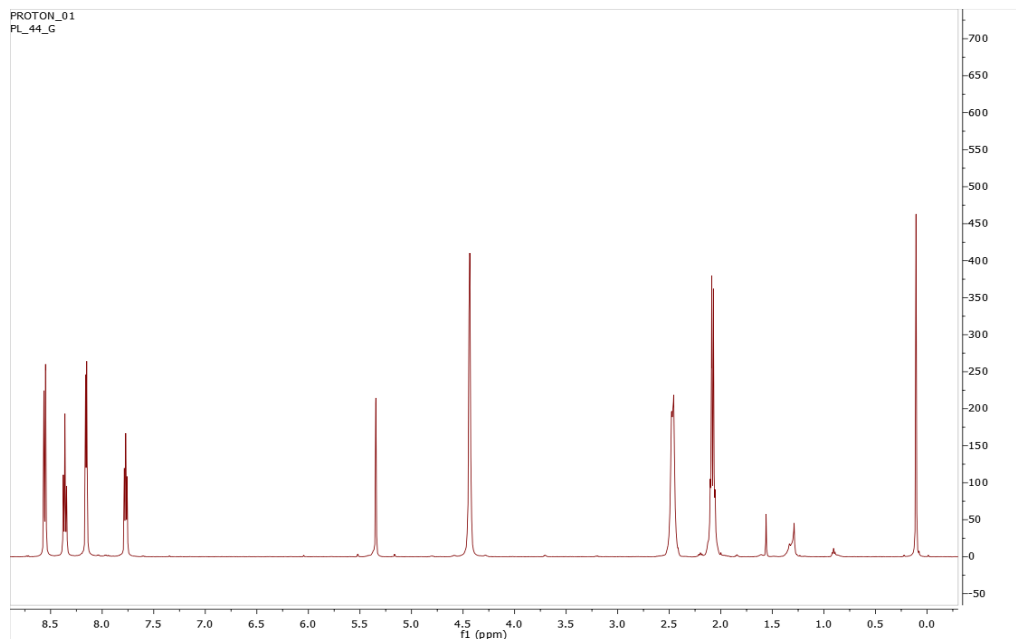

<sup>1</sup>H NMR Spectrum of Complex 1g at 25 °C in CD<sub>2</sub>Cl<sub>2</sub>

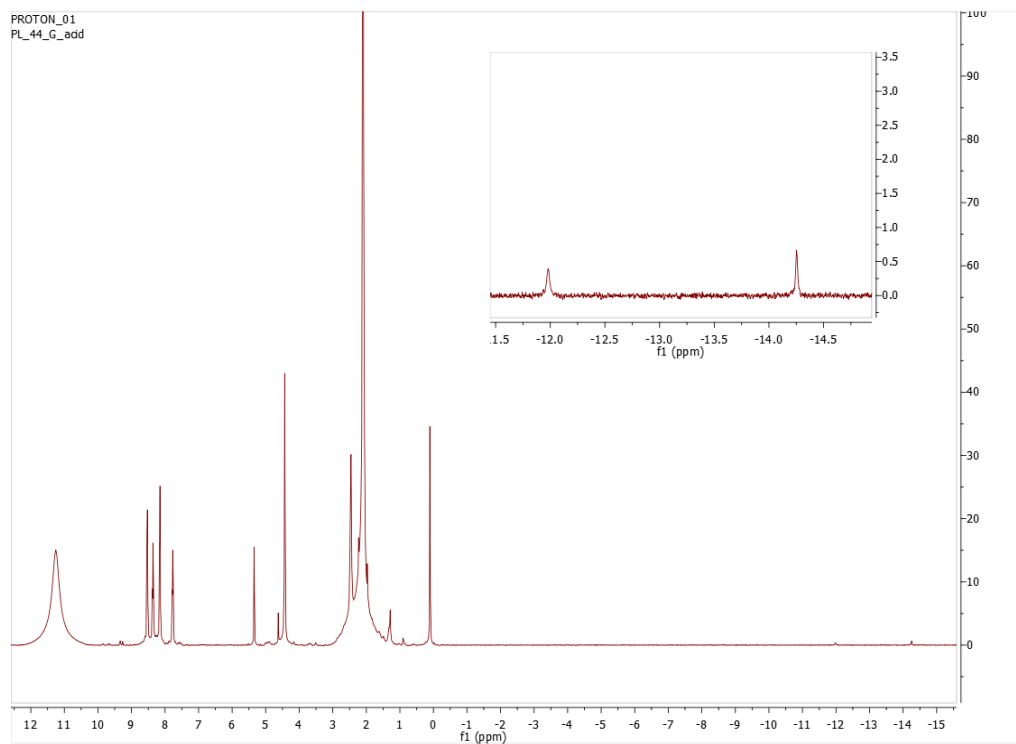

<sup>1</sup>H NMR Spectrum of Complex 1g after addition of hydrogen and acetic acid at 25 °C in CD<sub>2</sub>Cl<sub>2</sub>

# Complex 1h

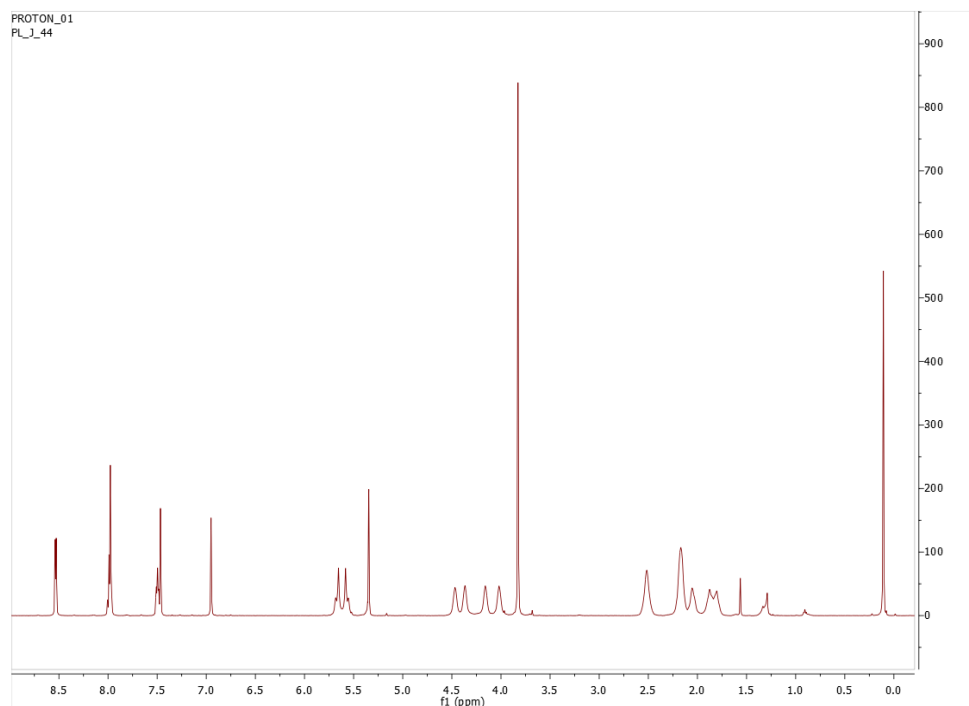

<sup>1</sup>H NMR Spectrum of Complex **1h** at 25 °C in CD<sub>2</sub>Cl<sub>2</sub>

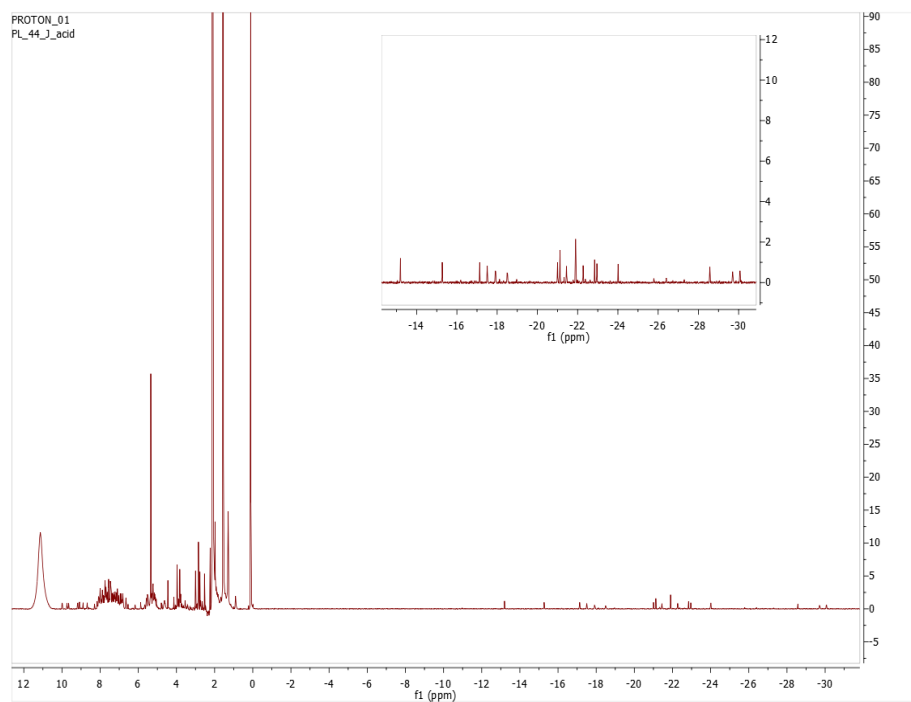

<sup>1</sup>H NMR Spectrum of Complex **1h** after addition of hydrogen and acetic acid at 25 °C in CD<sub>2</sub>Cl<sub>2</sub>

### III. Complete Kinetics Graph for Formic Acid Dehydrogenation

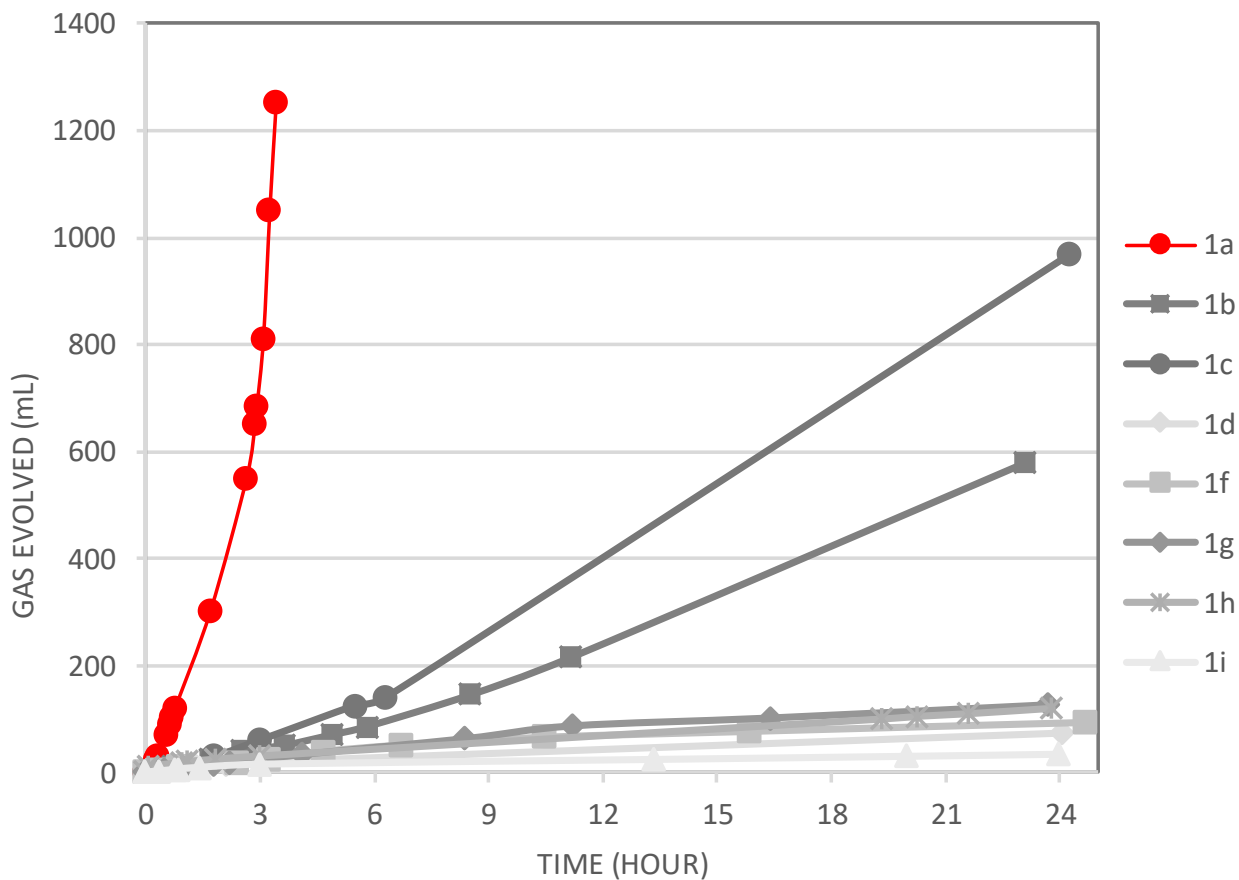

Comparison of pre-catalysts 1 in the dehydrogenation of formic acid
